# Supplementary material for: Large genomic fragment deletion and functional gene cassette knock-in via Cas9 protein mediated genome editing in one-cell rodent embryos
Source: PubMed Central journal article supplement (PMC4664917; doi:10.1038/srep17517), 2015-12-01

## Supplementary Information

### Large genomic fragment deletion and functional gene cassette knock-in via Cas9 protein mediated genome editing in one-cell rodent embryos

Liren Wang<sup>1,2†</sup>, Yanjiao Shao<sup>1,†</sup>, Yuting Guan<sup>1,†</sup>, Liang Li<sup>1</sup>, Lijuan Wu<sup>1</sup>, Fangrui Chen<sup>1</sup>, Meizhen Liu<sup>1</sup>, Huaqing Chen<sup>1</sup>, Yanlin Ma<sup>3</sup>, Xueyun Ma<sup>1</sup>, Mingyao Liu<sup>1,4,\*</sup> and Dali Li<sup>1,\*</sup>

<sup>1</sup>Shanghai Key Laboratory of Regulatory Biology, Institute of Biomedical Sciences and School of Life Sciences, East China Normal University, Shanghai 200241, China

<sup>2</sup>The Key Laboratory of Adolescent Health Assessment and Exercise Intervention of Ministry of Education, East China Normal University, Shanghai 200241, China.

<sup>3</sup>Hainan Provincial Key Laboratory for human reproductive medicine and Genetic Research, Hainan Reproductive Medical Center, the Affiliated Hospital of Hainan Medical University, Haikou 570102, China

<sup>4</sup>The Institute of Biosciences and Technology, Texas A&M University Health Science Center, Houston, Texas 77030, USA

\* Correspondence should be addressed to: Dr. Dali Li and Mingyao Liu, Shanghai Key Laboratory of Regulatory Biology, Institute of Biomedical Sciences and School of Life Sciences, East China Normal University, Shanghai 200241, China; E-mail: dlli@bio.ecnu.edu.cn or mliu@bio.ecnu.edu.cn

#### Table of Contents

Supplementary Figure 1. Generation of mouse strain with 53 kb deletion of lncRNA Gm14005 genomic DNA.

Supplementary Figure 2. Generation of site-specific mutations via Cas9 protein using ssODNs as donor template.

Supplementary Figure 3. Detection of GFP expression in Lgr5GFP/+ rat strain.

Supplementary Table 1. Numbers and percentage of injected and transferred embryos and the Indel and HDR rate

**Figure S1. Generation of a mouse strain with a 53 kb deletion of lncRNA Gm14005 genomic DNA.** (a) Schematic overview of the knockout strategy. The sequences of sgRNAs targeting exon1 and exon2 of Gm14005 are listed in blue. The PAM sequences are in red. After deletion, the positions of primers are shown with arrows. F, sense genotyping primer; R, antisense genotyping primer. (b) PCR analysis of F0 founders (left) and F1 progenies of the founder (right). Arrowhead indicates detection of successful deletion of the 53kb genomic DNA fragment. M, DNA marker.

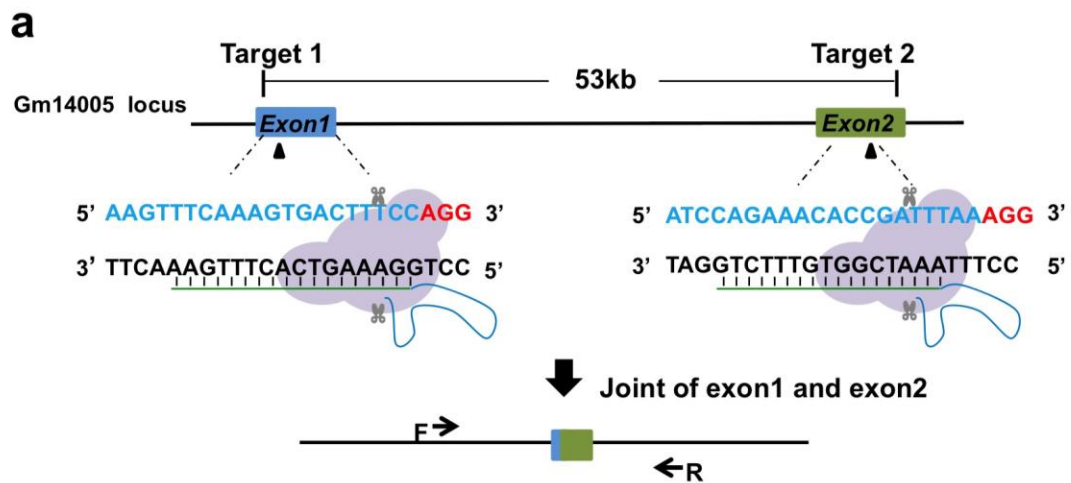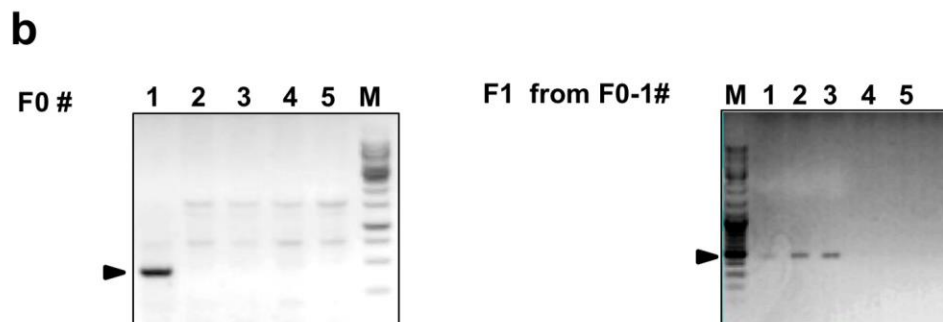

**F0 #1 sequence analysis**

WT TTTCTAAGTTCAAAGTGACTTTCCAGG-(53kb)-ATCCAGAAACACCGATTAAAGGGCT  
 F0 #1 TTTCTAAGTTCAAAG-----GGCT

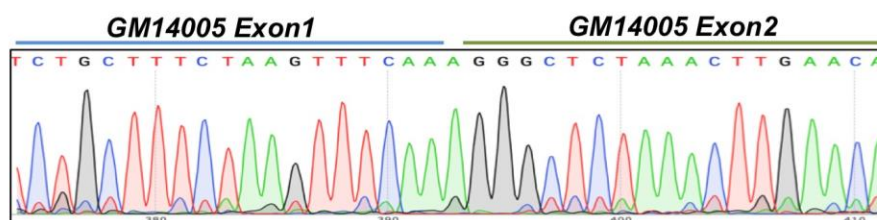

**Figure S2. Generation of site-specific mutations via Cas9 protein using ssODNs as a donor template.** (a) Schematic overview of the strategy to introduce specific mutations in the *Sin1* locus. PAM sequence is in red. The synonymous mutations are labeled in blue, point mutations in purple. The sgRNA targeting sequence is underlined. (b) The sequences of F0 pups are listed. Labeling is as above, with random insertions in green. The founder with the desired mutations is labeled with a red asterisk.

**a**

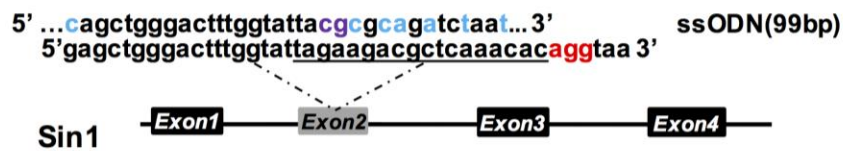

**b**

### F0 Founders sequence

```

Mut CAGCTGGGACTTTGGTATTAG AAG ACG CTCAAACACAGG TAAACT
WT  GAGCTGGGACTTTGGTATTAG AAG ACG CTCAAACACAGG TAAACT

#1  GAGCTGGGACTTTGGTATTAG AAG ACG CTCAAACACAGG TAAACT (WT)
    GAGCTGGGACTTTGGTATTAG AAG ACG CTCAA-----AGG TAAACT

#3  GAGCTGGGACTTTGGTATTAG AAG ACG CTCAG ATCTAA TACAGG TAAACT

#4  GAGCTGGGACTTTGGTATTAG AAG ACG CTCAAACACAGG TAAACT (WT)
    GAGCTGGGACTTTGGTA-----A TACAGG TAAACT
    GAGCTGGGA CTTTGGTATTAGAAGACGCTCAAATCACAGG TAAACT

#5  GAGCTGGGACTTTGGTATTAG AAG ACG CTCAAACACAGG TAAACT (WT)
    -(ins61bp)-GAGCTGGGACTTTGG TATTACGCGAGATCTAATACAGG TAAACT

#7  GAGCTGGGACTTTGGTATTAG AAG ACG CTCAA TACAGG TAAACT
    GAGCTGGGACTTTGGTATTAG AAG ACG CTCAAAC-CAGG TAAACT

#8  GAGCTGGGACTTTGGTATTAG AAG ACG CTCAAACACAGG TAAACT (WT)
    -----AGATCTAATACAGG TAAACT
    GAGCTGGGACTTTGGTATTA-----AACT
    *GAGCTGGGACTTTGGTATTA CGCGCAGATCTAA TACAGG TAAACT

#9  GAGCTGGGACTTTGGTATTAG AAG ACG CTCAAATACAGG TAAACT (WT)
    GAGCTGGGACTTTGGTATTAG AAG ACG C-----ACAGG TAAACT

#10 GAGCTGGGACTTTGGTATTAGAAGACGCTCAAACA-----GGTAAACT

#11 GAGCTGGGACTTTGGTATTAG AAG ACG CTCAAACGCGCAGATCTAATACAGG TAAACT
    GAGCTGGGACTTTGGTATTAG AAG ACG CTCAATTGGTATTACGCGCAGATCTAA TACAGG TAAACT
  
```

#2 and #6 mice are Wild Type

**Figure S3. Detection of GFP expression in  $Lgr5^{GFP/+}$  rat strain.** (a) Immunofluorescent staining of the GFP protein with anti-GFP antibody in rat small intestine. Arrowheads: GFP-positive cells. Scale bar, 100 $\mu$ m.

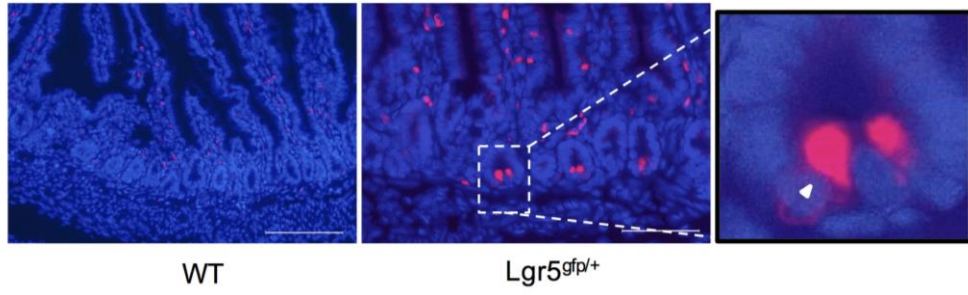

**Table S1:** oligonucleotides and sgRNA targeting sequences.

| Genotyping primers                          | Sense 5'-3'             | Antisense 5'-3'        |
|---------------------------------------------|-------------------------|------------------------|
| <i>Sin1</i>                                 | GGTGAGCCTGTGAAACAGTATG  | GGCTAGCCTGCTCCTATAGTAA |
| <i>Sirt3</i>                                | GGGACCATTACAGAGTGAAGA   | CATACAGAGCCACAGACATACC |
| <i>Fpr1-3</i> deletion                      | TTAGGTGGAGTTATGGTAGTGG  | TTCAGGTCCCAAAGACAAAC   |
| <i>Nfatc1-Cre<sup>ERT2</sup>-1</i> (F1, R1) | CCTCCGGCCAATTCACAATC    | ACACCGGCCTTATTCCAAGC   |
| <i>Nfatc1-Cre<sup>ERT</sup>-2</i> (F2, R2)  | TTTCCTGCCACAGCTTGA      | ATTTCCCGAAAGGAAGAGGC   |
| <i>Lgr5-fl-gfp1</i> (P1, P2)                | GCCCAATATGTATGTAACAGAC  | GTCCAAACTCATCAATGTATCT |
| <i>Lgr5-fl-gfp2</i> (P3, P4)                | TCGCCCTTGCTCACCATACT    | CACGCACAGGTCATAACCAGAC |
| <i>Lgr5-fl-gfp3</i> (RT1, RT2)              | CTCAGCGTCTTCACCTCCTACC  | GCGTTGTCATCTAGCCACAGG  |
| <i>Lgr5-fl-gfp4</i> (RT3)                   |                         | GCTCGATGCGGTTCCACCAG   |
| <i>lncRNA GM14005</i>                       | CTAACCAAAGCGTCTCCTCCC   | TGATGAGATTCCAGCTCCACA  |
|                                             |                         |                        |
| Off target primer 5'-3'                     | Sense 5'-3'             | Antisense 5'-3'        |
| <i>Ar off target 1</i>                      | ATGGCTGGATATGTTTGAGA    | TACATCACAAGGAAGACCAA   |
| <i>Ar off target 2</i>                      | CCTACATAGTGATTGCCTAAC   | CTTCTACACAACCTGCCATC   |
|                                             |                         |                        |
| sgRNA Target sequence 5'-3'                 |                         |                        |
| <i>sgSin1</i>                               | ATTAGAAGACGCTCAAACAC    |                        |
| <i>sgSirt3</i>                              | TCCCAAAGAACACAATGTC     |                        |
| <i>sgFpr1</i>                               | CTGCTGGCTACATCGTTC      |                        |
| <i>sgFpr3</i>                               | TTCTCTGTCCCCCGAATT      |                        |
| <i>sgNfatc1</i>                             | TGACGTGAGACTTTAATA      |                        |
| <i>sgAr</i>                                 | GGAGGCAGCTGCTCTCAGGG    |                        |
| <i>sgGM14005 exon1</i>                      | AAGTTTCAAAGTGACTTTCCAGG |                        |
| <i>sgGM14005 exon2</i>                      | ATCCAGAAACACCGATTTAAAGG |                        |

**Original gel images** (a) Original gel image of T7E1 assay for *Nfatc1* F0 identification in Fig4 b. (b) Original gel image of beta actin band in the RT-PCR assay in Fig5 b right. (c) Original gel image of *Lgr5* band in the RT-PCR assay in Fig5 b right. (d) Original gel image of *Lgr5* allele knock-in genotyping in Fig5 a right.

**a**

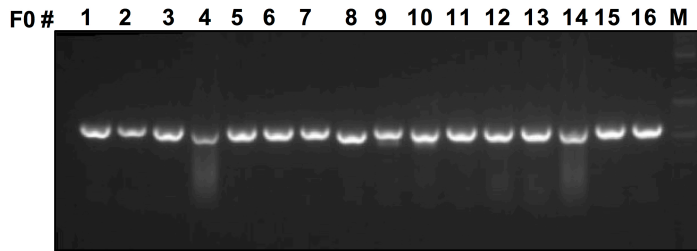

**b**

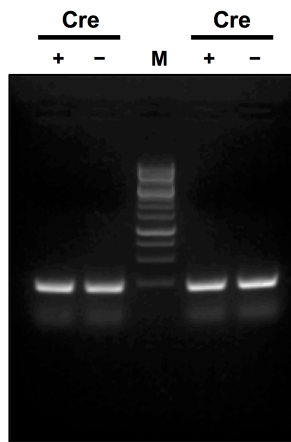

**c**

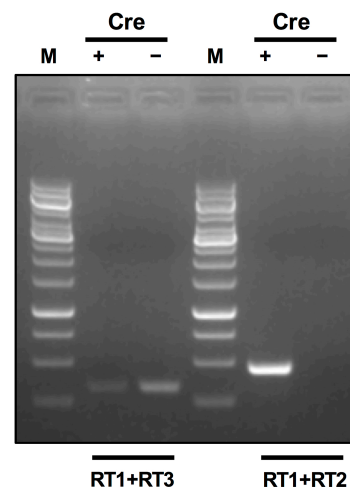

**d**

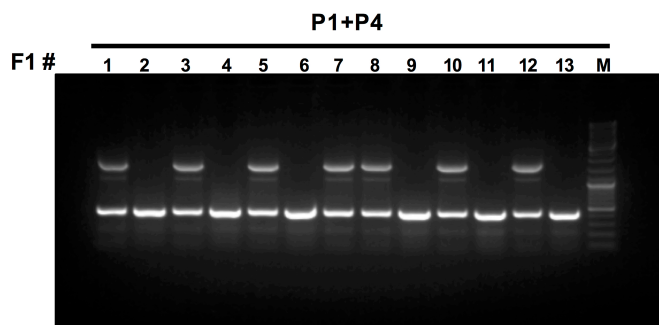

Supplement: srep17517-s1.pdf [file srep17517-s1.pdf]
